# Supplementary material for: Hepatitis C Virus Proteins Core and NS5A Are Highly Sensitive to Oxidative Stress-Induced Degradation after eIF2α/ATF4 Pathway Activation
Source: MDPI journal article supplement (doi:10.3390/v12040425), 2020-04-09
Supplement: s1 [file s1]

## SUPPLEMENTARY FIGURES

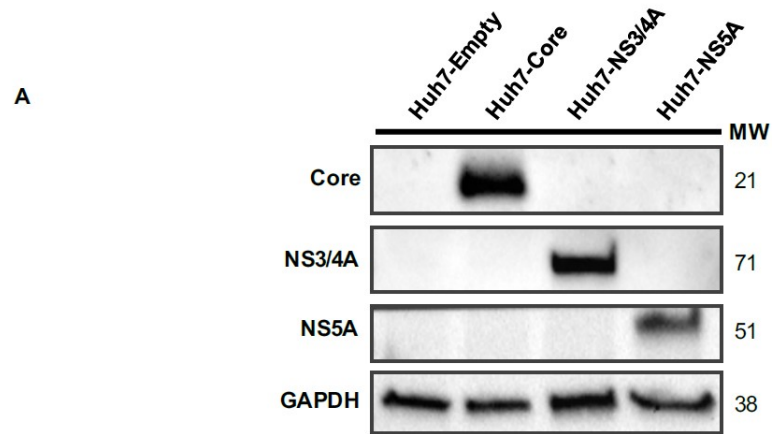

**Supplementary Figure S1. HCV Core-, NS3/4A- and NS5A-protein expression.** The expression of HCV Core, NS3/4A and NS5A proteins was determined by Western blotting in stably transfected Huh7 cells. The expression of GAPDH was used as a loading control.

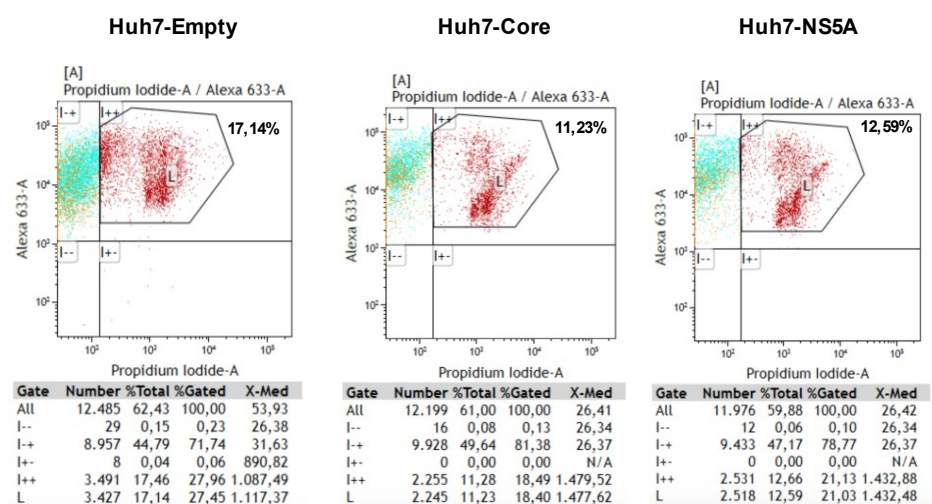

**Supplementary Figure S2. Huh7 cells expressing HCV Core and NS5A resist to menadione-induced apoptosis** Pre-apoptotic cells were quantified by flow cytometry using DiIC(5) (10 $\mu$ M) and PI (100 $\mu$ g/mL) after menadione treatment (50 $\mu$ mol/L).

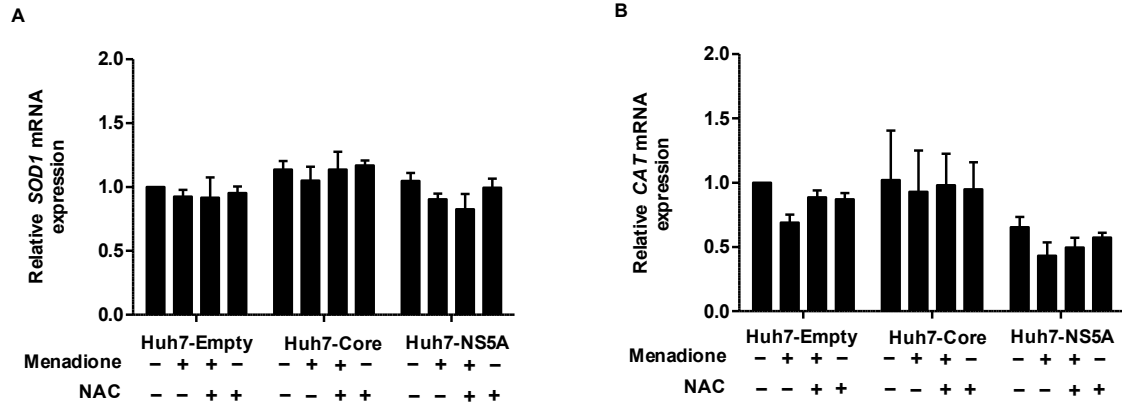

**Supplementary Figure S3. Transcriptional regulation of antioxidant enzyme genes is not involved in the protection against menadione-induced apoptosis.** The mRNA levels of antioxidant enzymes *SOD1* (A) and *CAT* (B) were quantified using qPCR in Huh7 cells expressing the empty vector, HCV Core and NS5A. Cells were treated with menadione (50  $\mu$ mol/L) to induce oxidative stress and in some experiments NAC (5 mmol/L) was used as antioxidant. The relative mRNA expression was normalized relative to 18S. The graphs depict means  $\pm$  s.d. of three independent experiments. *t* test was performed to compare the means (*p* values > 0.05 are considered not statistically significant).

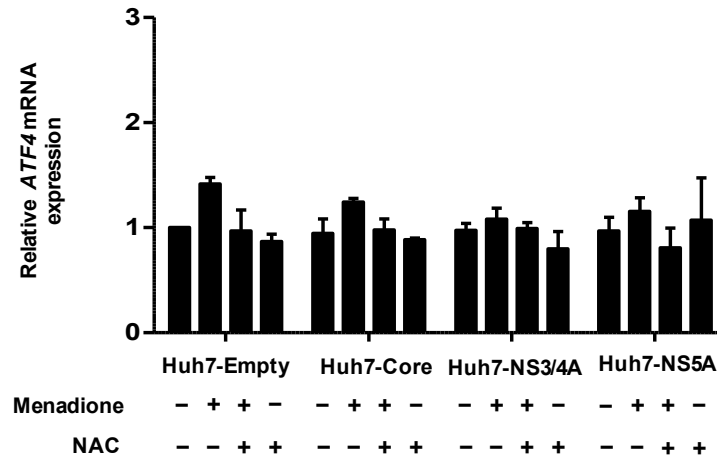

**Supplementary Figure S4. *ATF4* mRNA expression.** *ATF4* mRNA expression in Huh7 cells treated with menadione was quantified using qPCR in Huh7 cells expressing the empty vector, HCV Core, NS3/4A and NS5A. Cells were treated with 50  $\mu$ mol/L menadione and/or 5 mmol/L NAC. The relative expression was normalized relative to 18S. The graphs depict means  $\pm$  s.d. of three independent experiments. *t* test was performed to compare the means (*p* values > 0.05 are considered not statistically significant).

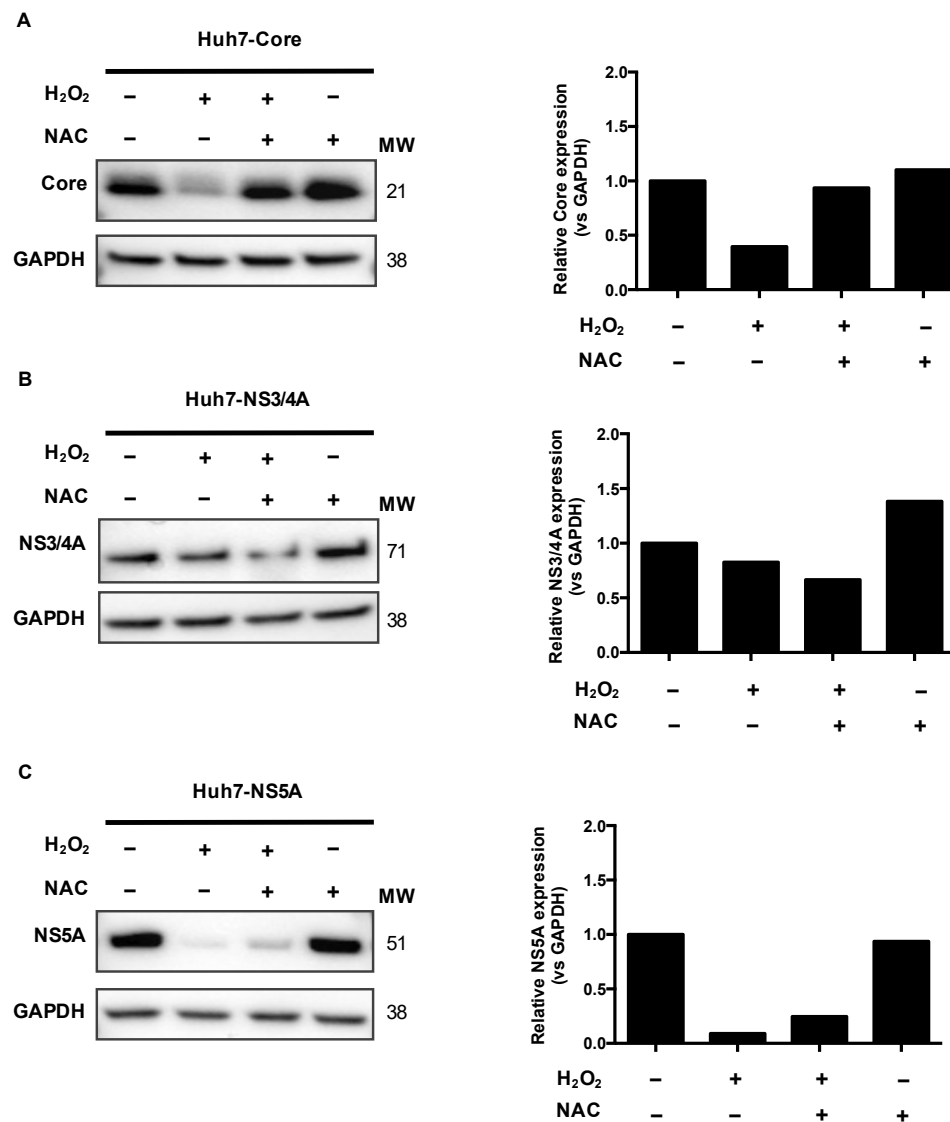

**Supplementary Figure S5. Degradation of HCV Core and NS5A is independent of menadione treatment.** H<sub>2</sub>O<sub>2</sub> (5 mmol/L) was used as an alternative inducer of oxidative stress to confirm the results obtained using menadione. Huh7 cells expressing HCV Core (A), NS3/4A (B) and NS5A (C) were treated with H<sub>2</sub>O<sub>2</sub> for 6 h. In some experiments cells were treated with 5 mmol/L NAC 30 min prior to H<sub>2</sub>O<sub>2</sub> treatment. Protein band intensities were quantified using ImageLab software (BioRad). The relative protein expression was calculated based on the expression of GAPDH and compared to the expression of the control cells.

## SUPPLEMENTARY TABLES

**Supplementary Table 1. Primers and probes for qPCR.**

| Name             | Type        | Specie    | Sequence (5'-3')                        |
|------------------|-------------|-----------|-----------------------------------------|
| <b>18S_F</b>     | Pr. Forward | Human/Rat | CGG CTA CCA CAT CCA AGG A               |
| <b>18S_R</b>     | Pr. Reverse | Human/Rat | CCA ATT ACA GGG CCT CGA AA              |
| <b>18S_P</b>     | Probe       | Human/Rat | CGC GCA AAT TAC CCA CTC CCG A           |
| <b>CuZnSOD_F</b> | Pr. Forward | Human     | CTCACTTTAATCCTCTATCCAGAAAACA            |
| <b>CuZnSOD_R</b> | Pr. Reverse | Human     | ATCTTTGTCAGCAGTCACATTGC                 |
| <b>CuZnSOD_P</b> | Probe       | Human     | CAACATGCCTCTCTTCATCCTTTGGCC             |
| <b>CAT_F</b>     | Pr. Forward | Human     | TTC GAT CTC ACC AAG GTT TGG             |
| <b>CAT_R</b>     | Pr. Reverse | Human     | GTT GCT TGG GTC GAA GGC TAT             |
| <b>CAT_P</b>     | Probe       | Human     | CAC AAG GAC TAC CCT CTC ATC CCA GTT GG  |
| <b>GRP78_F</b>   | Pr. Forward | Human     | TGG TGA TCA AGA TAC AGG TGA CCT         |
| <b>GRP78_R</b>   | Pr. Reverse | Human     | GTG TTC CTT GGA ATC AGT TTG GT          |
| <b>GRP78_P</b>   | Probe       | Human     | TCC CCT TAC ACT TGG TAT TGA AAC TGT GGG |
| <b>ATF4_F</b>    | Pr. Forward | Human     | CAG CAA GGA GGA TGC CTT CT              |
| <b>ATF4_R</b>    | Pr. Reverse | Human     | CCA ACA GGG CAT CCA AGT C               |
| <b>ATF4_P</b>    | Probe       | Human     | CCA TTT TCT CCA ACA TCC AAT CTG TCC C   |
| <b>DDIT3_F</b>   | Pr. Forward | Human     | GGAAATGAAGAGGAAGAATCAAAAAT              |
| <b>DDIT3_R</b>   | Pr. Reverse | Human     | GTTCTGGCTCCTCCTCAGTCA                   |
| <b>DDIT3_P</b>   | Probe       | Human     | TTCACCACTCTTGACCCTGCTTCTCTGG            |

F=Forward/R=Reverse/P=Probe/Pr=Primer
